# Supplementary material for: The SARS-CoV-2 RNA with mild pulmonary consolidation lasts longer in non-severe COVID-19 patients: an observational study
Source: Research Square preprint supplement (doi:10.21203/rs.3.rs-43643/v2), 2020-10-23
Supplement: Supplementary file 1 [file 1394f4128d7c7a3b74a36b79.docx]

**Table S1 Summary of follow-up results**

| Patient | Days since admission | SARS-CoV-2 RNA* | SARS-CoV-2 IgM | SARS-CoV-2 IgG |
| --- | --- | --- | --- | --- |
| #1 | 56 | - | - | + |
|  | 67 | - | - | + |
| #2 | 50 | - | - | + |
|  | 68 | - | - | - |
| #3 | 49 | - | - | + |
|  | 67 | - | - | + |
| #4 | 45 | - | - | + |
| #5 | 51 | - | - | + |
|  | 69 | - | - | - |
| #6 | 52 | - | - | + |
|  | 69 | - | - | + |
| #7 | 56 | - | - | + |
|  | 67 | - | - | + |
| #8 | 68 | - | - | + |
| #9 | 40 | - | - | + |
|  | 57 | - | - | + |
| #10 | 33 | - | + | + |
| #11 | 44 | - | ± | + |
|  | 61 | - | - | + |
| #12 | 54 | - | + | + |
|  | 65 | - | - | + |
| #13 | 30 | - | - | + |
|  | 44 | - | - | + |
| #15 | 36 | - |  |  |
|  | 50 | - | - | + |
| #16 | 35 | - | - | + |
|  | 50 | - | - | + |
| #17 | 35 | - | + | + |
|  | 53 | - | - | + |
| #18 | 54 | - | - | + |

*The SARS-CoV-2 RNA reexamination was throat swab.

- negative, + positive, ± weakly positive
